# Supplementary material for: Elevated Glycated Haemoglobin (HbA1c) Is Associated with an Increased Risk of Pancreatic Ductal Adenocarcinoma: A UK Biobank Cohort Study
Source: MDPI journal article supplement (doi:10.3390/cancers15164078), 2023-08-13
Supplement: s1 [file s1]

## Supplementary Tables

Table S1. Characteristics of study participants at baseline stratified by diabetes mellitus status at enrolment to UK Biobank.

| Participant characteristics                             | No diabetes mellitus on enrolment | Diabetes mellitus on enrolment | Total           | P value             |
|---------------------------------------------------------|-----------------------------------|--------------------------------|-----------------|---------------------|
| Number of Participants, n (%)                           | 473,264 (94.7%)                   | 26,540 (5.3%)                  | 499,804         | <0.001 <sup>b</sup> |
| Age at attendance (years) <sup>a</sup>                  | 56.4 (8.1)                        | 59.5 (7.2)                     | 56.5 (8.1)      | <0.001 <sup>b</sup> |
| Men, n (%)                                              | 211,583 (44.7%)                   | 16,095 (60.6%)                 | 227,678 (45.6%) | <0.001 <sup>c</sup> |
| Glycated haemoglobin (HbA1c) category (mmol/mol), n (%) |                                   |                                |                 | <0.001 <sup>c</sup> |
| <42mmol/mol                                             | 420,789 (95.6%)                   | 5,208 (21.3%)                  | 425,997 (91.7%) |                     |
| 42-47 mmol/mol                                          | 15,852 (3.6%)                     | 5,186 (21.2%)                  | 21,038 (4.5%)   |                     |
| ≥48mmol/mol                                             | 3,360 (0.8%)                      | 14,038 (57.5%)                 | 17,398 (3.8%)   |                     |
| Body mass index (BMI) <sup>a</sup>                      | 27.2 (4.6)                        | 31.3 (5.9)                     | 27.4 (4.8)      | <0.001 <sup>b</sup> |
| Body mass index (BMI) category, n (%)                   |                                   |                                |                 | <0.001 <sup>c</sup> |
| Underweight <sup>d</sup>                                | 2,574 (0.6%)                      | 36 (0.1%)                      | 2,610 (0.5%)    |                     |
| Normal <sup>d</sup>                                     | 156,970 (33.3%)                   | 2,838 (10.8%)                  | 159,808 (32.1%) |                     |
| Overweight <sup>d</sup>                                 | 202,425 (43.0%)                   | 8,961 (34.2%)                  | 211,386 (42.5%) |                     |
| Obese <sup>d</sup>                                      | 108,990 (23.1%)                   | 14,381 (54.9%)                 | 123,371 (24.8%) |                     |
| Ethnic background                                       |                                   |                                |                 | <0.038 <sup>c</sup> |
| White                                                   | 448,453 (95.1%)                   | 23,043 (87.29%)                | 472,616 (94.6%) |                     |
| Mixed                                                   | 2,759 (0.6%)                      | 175 (0.7%)                     | 2,954 (0.6%)    |                     |
| Asian or Asian British                                  | 7,967 (1.7%)                      | 1,703 (6.5%)                   | 9,879 (2.0%)    |                     |

|                                     |                 |                |                 |                     |
|-------------------------------------|-----------------|----------------|-----------------|---------------------|
| Black or Black British              | 7,052 (1.5%)    | 914 (3.5%)     | 8,058 (1.6%)    |                     |
| Chinese                             | 1,440 (0.3%)    | 93 (0.4%)      | 1,573 (0.3%)    |                     |
| Other ethnic group                  | 4,103 (0.9%)    | 470 (1.8%)     | 4,557 (0.9%)    |                     |
| <b>Weight change in past year</b>   |                 |                |                 | <0.001 <sup>c</sup> |
| Lost weight                         | 68,271 (14.7%)  | 7,293 (28.0%)  | 75,564 (15.4%)  |                     |
| No change                           | 263,115 (56.6%) | 11,982 (46.0%) | 275,097 (56.0%) |                     |
| Gained weight                       | 133,463 (28.7%) | 6,775 (26.0%)  | 140,238 (28.6%) |                     |
| <b>Smoking status, n (%)</b>        |                 |                |                 | <0.001 <sup>c</sup> |
| Never                               | 260,524 (55.3%) | 12,133 (46.1%) | 272,657 (54.8%) |                     |
| Former                              | 161,263 (34.2%) | 11,263 (42.8%) | 172,564 (34.7%) |                     |
| Current (<20/day)                   | 37,210 (7.9%)   | 2,046 (7.8%)   | 39,256 (7.9%)   |                     |
| Current (≥20/day)                   | 12,524 (2.7%)   | 906 (3.4%)     | 13,430 (2.7%)   |                     |
| <b>Alcohol consumption, n (%)</b>   |                 |                |                 | <0.001 <sup>c</sup> |
| Never                               | 35,898 (7.6%)   | 4,343 (16.4%)  | 40,241 (8.1%)   |                     |
| Special Occasions                   | 52,787 (11.2%)  | 4,964 (18.7%)  | 57,751 (11.6%)  |                     |
| One to three times a month          | 52,470 (11.1%)  | 3,217 (12.1%)  | 55,687 (11.2%)  |                     |
| Once or twice a week                | 122,825 (26.0%) | 6,114 (23.1%)  | 128,939 (25.8%) |                     |
| Three or four times a week          | 111,157 (23.5%) | 4,057 (15.3%)  | 115,214 (23.1%) |                     |
| Daily                               | 97,724 (20.7%)  | 3,800 (14.3%)  | 101,524 (20.3%) |                     |
| <b>Processed meat intake, n (%)</b> |                 |                |                 | <0.001 <sup>c</sup> |
| Never                               | 44,622 (9.5%)   | 2,007 (7.6%)   | 46,629 (9.4%)   |                     |
| Less than once a week               | 145,167 (30.7%) | 6,760 (25.6%)  | 151,927 (30.5%) |                     |
| Once a week                         | 137,846 (29.2%) | 7,722 (29.2%)  | 145,568 (29.2%) |                     |
| 2-4 times/week                      | 126,339 (26.8%) | 8,526 (32.3%)  | 134,865 (27.1%) |                     |

|                          |               |              |               |  |
|--------------------------|---------------|--------------|---------------|--|
| 5 or more times per week | 18,259 (3.9%) | 1,398 (5.3%) | 19,657 (3.9%) |  |
|--------------------------|---------------|--------------|---------------|--|

<sup>a</sup>Mean average (standard deviation)

<sup>b</sup>Student’s t test for continuous data

<sup>c</sup>χ<sup>2</sup> test for categorical variables

<sup>d</sup>Adjusted for variations in ethnic-specific variations. Underweight = <18.5kg/m<sup>2</sup>, normal 18.5-24.9kg/m<sup>2</sup> (18.5 - 22.9kg/m<sup>2</sup> in Asian population), overweight = 25.0 - 29.9kg/m<sup>2</sup> (23-27.4kg/m<sup>2</sup> in Asian population), obese = ≥30.0kg/m<sup>2</sup> (27.5kg/m<sup>2</sup> in Asian population)

**Table S2. Univariable risk of incident pancreatic ductal adenocarcinoma according to glycated haemoglobin, body mass index, weight change compared to one year ago, smoking status, alcohol consumption, processed meat intake, age and sex in subjects with and without diabetes mellitus at enrolment to UK Biobank<sup>a</sup>.**

| Variable                                               | Diabetes<br><br>on<br><br>enrolment | Participants (n) | Univariable Hazard<br><br>Ratio (95% CI) | P value | Proportional<br><br>Hazards<br><br>assumption |
|--------------------------------------------------------|-------------------------------------|------------------|------------------------------------------|---------|-----------------------------------------------|
| Glycated haemoglobin (HbA1c)                           |                                     |                  |                                          |         |                                               |
| <42mmol/mol                                            | No                                  | 420,789          | 1 (Reference) (N/A <sup>b</sup> )        |         | <0.001                                        |
| 42-47mmol/mol                                          |                                     | 15,852           | 2.07 (1.62 - 2.66) (N/A <sup>b</sup> )   | <0.001  |                                               |
| ≥48mmol/mol                                            |                                     | 3,360            | 2.82 (1.79 - 4.44) (N/A <sup>b</sup> )   | <0.001  |                                               |
| Body mass index (BMI)                                  |                                     |                  |                                          |         |                                               |
| Underweight <sup>c</sup>                               | No                                  | 2,576            | 0.67 (0.21 - 2.08)                       | 0.615   | 0.7703                                        |
| Normal <sup>c</sup>                                    |                                     | 156,948          | 1 (Reference)                            |         |                                               |
| Overweight <sup>c</sup>                                |                                     | 202,435          | 1.22 (1.05 - 1.41)                       | 0.01    |                                               |
| Obese <sup>c</sup>                                     |                                     | 109,028          | 1.50 (1.27 - 1.76)                       | <0.001  |                                               |
| Ethnic background                                      |                                     |                  |                                          |         |                                               |
| White                                                  | No                                  | 448,453          | 1 (Reference)                            |         | 0.2644                                        |
| Mixed                                                  |                                     | 2,759            | 0.82 (0.34 – 1.97)                       | 0.651   |                                               |
| Asian or Asian British                                 |                                     | 7,967            | 0.40 (0.19 – 0.84)                       | 0.015   |                                               |
| Black or Black British                                 |                                     | 7,052            | 0.58 (0.30 – 1.11)                       | 0.104   |                                               |
| Chinese                                                |                                     | 1,440            | 0.93 (0.30 – 2.90)                       | 0.904   |                                               |
| Other ethnic group                                     |                                     | 4,103            | 0.79 (0.38 – 1.66)                       | 0.535   |                                               |
| Weight change compared to one<br>year ago <sup>d</sup> |                                     |                  |                                          |         |                                               |

|                              |    |         |                                        |        |        |
|------------------------------|----|---------|----------------------------------------|--------|--------|
| Lost weight                  | No | 68,292  | 0.95 (0.79 - 1.13) (N/A <sup>b</sup> ) | 0.561  | 0.032  |
| No change                    |    | 263,118 | 1 (Reference) (N/A <sup>b</sup> )      |        |        |
| Gained weight                |    | 133,465 | 0.85 (0.74 - 0.98) (N/A <sup>b</sup> ) | 0.03   |        |
| Smoking status               |    |         |                                        |        |        |
| Never                        | No | 260,506 | 1 (Reference)                          |        | 0.1116 |
| Former                       |    | 161,339 | 1.29 (1.13 - 1.48)                     | <0.001 |        |
| Current (<20/day)            |    | 37,214  | 1.57 (1.28 - 1.94)                     | <0.001 |        |
| Current (≥20/day)            |    | 12,526  | 2.63 (2.00 - 3.46)                     | <0.001 |        |
| Alcohol consumption          |    |         |                                        |        |        |
| Never                        | No | 35,904  | 1 (Reference)                          |        | 0.2965 |
| Special Occasions            |    | 52,799  | 0.91 (0.68 - 1.20)                     | 0.502  |        |
| One to three times a month   |    | 52,471  | 0.65 (0.48 - 0.88)                     | 0.005  |        |
| Once or twice a week         |    | 122,823 | 0.87 (0.68 - 1.12)                     | 0.281  |        |
| Three or four times a week   |    | 111,158 | 0.85 (0.66 - 1.10)                     | 0.216  |        |
| Daily                        |    | 97,734  | 1.17 (0.92 - 1.50)                     | 0.197  |        |
| Processed meat intake, n (%) |    |         |                                        |        |        |
| Never                        | No | 44,616  | 1 (Reference)                          |        | 0.148  |
| Less than once a week        |    | 145,168 | 1.25 (0.97 - 1.62)                     | 0.079  |        |
| Once a week                  |    | 137,857 | 1.32 (1.02 - 1.70)                     | 0.036  |        |
| 2-4 times/week               |    | 126,356 | 1.54 (1.19 - 1.98)                     | 0.001  |        |
| 5 or more times per week     |    | 18,259  | 1.53 (1.05 - 2.22)                     | 0.025  |        |
|                              |    |         |                                        |        |        |
| Age                          | No | 473,264 | 1.10 (1.09 - 1.11)                     | <0.001 | 0.3219 |
| Sex                          |    |         |                                        |        |        |
| Female                       | No | 261,677 | 1 (Reference)                          |        | 0.5014 |

|                                                   |     |         |                     |        |        |
|---------------------------------------------------|-----|---------|---------------------|--------|--------|
| Male                                              |     | 211,617 | 1.33 (1.18 - 1.50)  | <0.001 |        |
|                                                   |     |         |                     |        |        |
| Glycated haemoglobin (HbA1c)                      |     |         |                     |        |        |
| <42mmol/mol                                       | Yes | 5,208   | 1 (Reference)       |        | 0.716  |
| 42-47mmol/mol                                     |     | 5,186   | 1.38 (0.72 - 2.62)  | 0.33   |        |
| ≥48mmol/mol                                       |     | 14,038  | 1.83 (1.07 - 3.13)  | 0.028  |        |
| Body mass index (BMI)                             |     |         |                     |        |        |
| Underweight <sup>c</sup>                          | Yes | 40      | 6.43 (0.85 - 48.9)  | 0.072  | 0.1134 |
| Normal <sup>c</sup>                               |     | 3,116   | 1 (Reference)       |        |        |
| Overweight <sup>c</sup>                           |     | 9,406   | 1.08 (0.59 - 1.95)  | 0.811  |        |
| Obese <sup>c</sup>                                |     | 14,664  | 0.87 (0.49 - 1.55)  | 0.638  |        |
| Ethnic background                                 |     |         |                     |        |        |
| White                                             | Yes | 23,043  | 1 (Reference)       |        | 0.3887 |
| Mixed                                             |     | 175     | 1.11 (0.16 – 7.95)  | 0.917  |        |
| Asian or Asian British                            |     | 1,703   | 0.23 (0.06 – 0.92)  | 0.037  |        |
| Black or Black British                            |     | 914     | 0.64 (0.20 – 2.00)  | 0.440  |        |
| Chinese                                           |     | 93      | 2.07 (0.29 – 14.91) | 0.469  |        |
| Other ethnic group                                |     | 470     | 0.82 (0.20 – 3.30)  | 0.776  |        |
| Weight change compared to 1 year ago <sup>d</sup> |     |         |                     |        |        |
| Lost weight                                       | Yes | 7,437   | 1.37 (0.92 - 2.04)  | 0.122  | 0.0915 |
| No change                                         |     | 12,577  | 1 (Reference)       |        |        |
| Gained weight                                     |     | 7,035   | 0.84 (0.52 - 1.35)  | 0.471  |        |
| Smoking status                                    |     |         |                     |        |        |

|                              |     |        |                                        |        |        |
|------------------------------|-----|--------|----------------------------------------|--------|--------|
| Never                        | Yes | 12,606 | 1 (Reference)                          |        | 0.8642 |
| Former                       |     | 11,638 | 1.50 (1.01 - 2.23)                     | 0.043  |        |
| Current (<20/day)            |     | 2,151  | 2.17 (1.21 - 3.90)                     | 0.01   |        |
| Current (≥20/day)            |     | 965    | 2.41 (1.08 - 5.36)                     | 0.031  |        |
| Alcohol consumption          |     |        |                                        |        |        |
| Never                        | Yes | 4,425  | 1 (Reference) (N/A <sup>b</sup> )      |        | 0.0483 |
| Special Occasions            |     | 5,079  | 1.12 (0.63 - 2.01) (N/A <sup>b</sup> ) | 0.702  |        |
| One to three times a month   |     | 3,295  | 0.73 (0.35 - 1.52) (N/A <sup>b</sup> ) | 0.396  |        |
| Once or twice a week         |     | 6,363  | 0.87 (0.48 - 1.56) (N/A <sup>b</sup> ) | 0.635  |        |
| Three or four times a week   |     | 4,278  | 0.99 (0.53 - 1.86) (N/A <sup>b</sup> ) | 0.983  |        |
| Daily                        |     | 4,069  | 1.42 (0.79 - 2.55) (N/A <sup>b</sup> ) | 0.244  |        |
| Processed meat intake, n (%) |     |        |                                        |        |        |
| Never                        | Yes | 2,080  | 1 (Reference)                          |        | 0.2521 |
| Less than once a week        |     | 7,051  | 2.97 (0.91 - 9.72)                     | 0.072  |        |
| Once a week                  |     | 8,013  | 3.57 (1.11 - 11.54)                    | 0.033  |        |
| 2-4 times/week               |     | 8,841  | 3.27 (1.01 - 10.56)                    | 0.048  |        |
| 5 or more times per week     |     | 1,398  | 5.39 (1.50 - 19.33)                    | 0.01   |        |
|                              |     |        |                                        |        |        |
| Age                          | Yes | 26,540 | 1.07 (1.04 - 1.10)                     | <0.001 | 0.3303 |
| Sex                          |     |        |                                        |        |        |
| Female                       | Yes | 10,936 | 1 (Reference)                          |        | 0.2159 |
| Male                         |     | 16,621 | 1.40 (0.96 - 2.03)                     | 0.079  |        |

<sup>a</sup>Participants were asked at enrolment if they had ever been diagnosed with diabetes by a doctor or indicated they were taking medication for diabetes

<sup>b</sup>N/A due to violation of proportional hazards assumption

<sup>c</sup>Adjusted for variations in ethnic-specific variations. Underweight =  $<18.5\text{kg/m}^2$ , normal  $18.5\text{--}24.9\text{kg/m}^2$  ( $18.5\text{--}22.9\text{kg/m}^2$  in Asian population), overweight =  $25.0\text{--}29.9\text{kg/m}^2$  ( $23\text{--}27.4\text{kg/m}^2$  in Asian population), obese =  $\geq 30.0\text{kg/m}^2$  ( $27.5\text{kg/m}^2$  in Asian population)

<sup>d</sup>Weight change compared to 1 year ago - participants were asked if they had either lost weight, gained weight or had no change compared to one year prior to enrolment, with the latter as the reference range
